# Supplementary material for: A green route approach to the synthesis of Ni(II) and Zn(II) templated metal–organic frameworks
Source: Springer Nature journal article supplement (doi:10.1007/s10853-014-8277-1), 2014-05-09
Supplement: MOESM1 [file 3525772]

Supporting information for:

**A Green Route Approach to the Synthesis of Ni(II) and Zn(II) Templated Metal-Organic Frameworks.**

Adedibu C. Tella* and Samson O. Owalude

Department of Chemistry, University of Ilorin, P.M.B. 1515, Ilorin, Nigeria

**
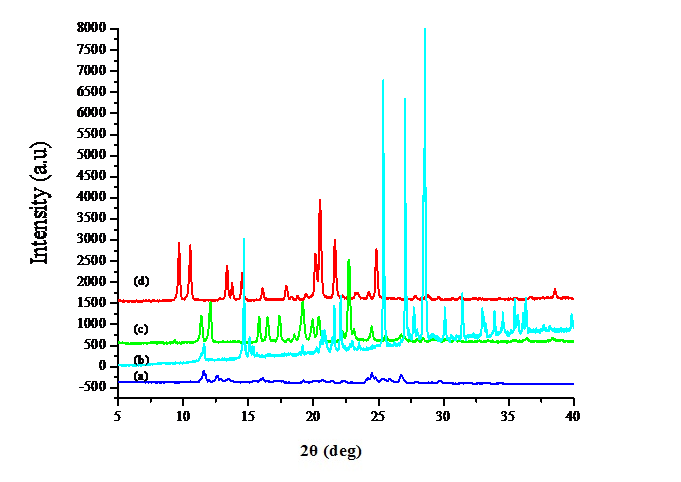
**

**Fig. S1.** Comparison of XRPD patterns of starting materials and mixture before heating (a) Ni(NO3)2.6H2O + 4-4 bipyridine + pyrene mixture (before heating) (b) Ni(NO3)2.6H2O (c) 4,4-bipyridine (d) pyrene


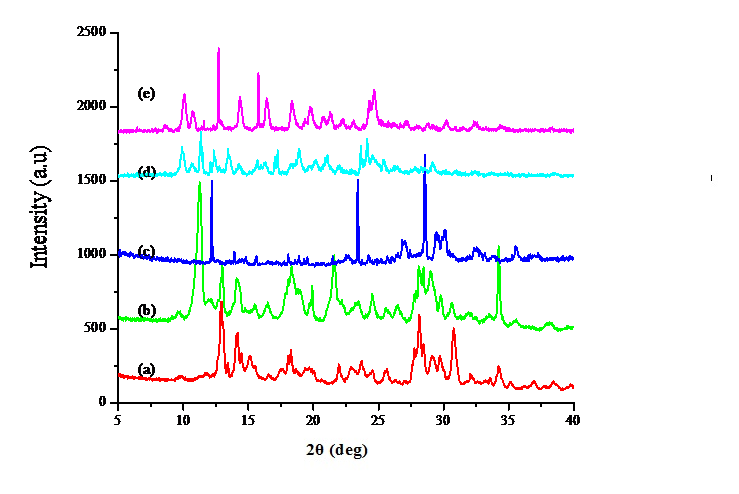


**Fig. S2.** XRPD patterns for the formation of[Ni(NO3)2(bipy)2](pyrene)2. (a) Ni(NO3)2.6H2O + 4-4 bipyridine + pyrene mixture (b) 45oC/4 hrs (c) 60oC/4hrs (d) 70oC/4 hrs (e) 85oC/4 hrs

**
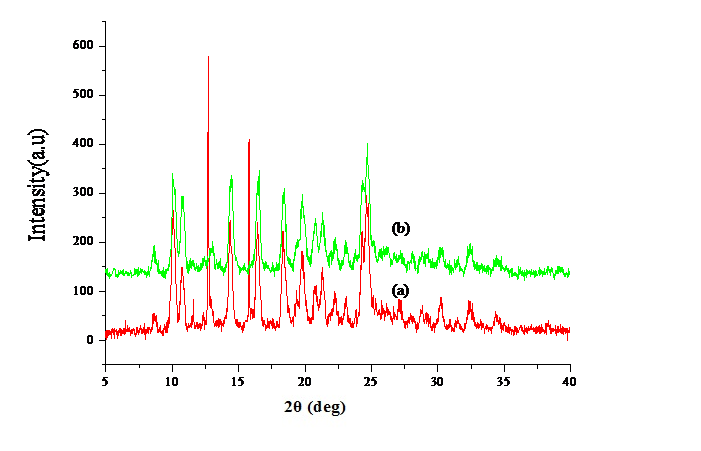
**

**Fig. S3.** Comparison of XRPD patterns of [Ni(NO3)2(bipy)2](pyrene)2 synthesized by (a) mixing and heating at 85oC for 4 hrs (b) Ball-milled method

**
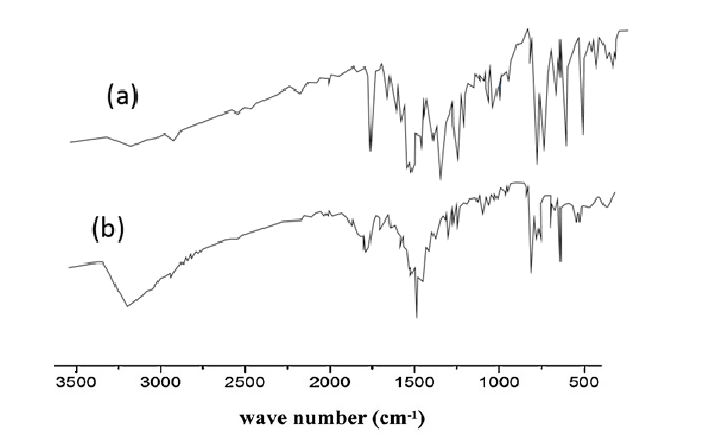
**

**Fig. S4.** FT-IR spectra of [Ni(NO3)2(bipy)2](pyrene)2 (a) after heating and (b) before heating.

**Fig S5:** Comparison of XRPD patterns of starting materials and mixtures before heating (a) Zn(OOCCH3)2.2H2O + fumaric acid + 4,4-bipyridine mixture (b) Zn(OOCCH3)2.2H2O (c) 4,4-bipyridine (d) fumaric acid

**
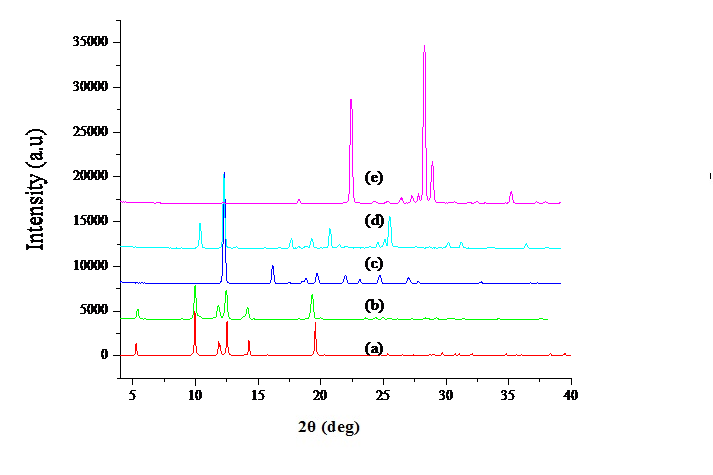
**

**Fig. S6**. Comparison of XRPD patterns of product and starting materials (a) Simulated patterns from single crystal of [Zn2(fumarate)2(bipy)] (CSD code MATNUT01) (b) product **2** (c) Zinc acetate (d) 4,4-bipyridine (e) Fumaric acid.

**
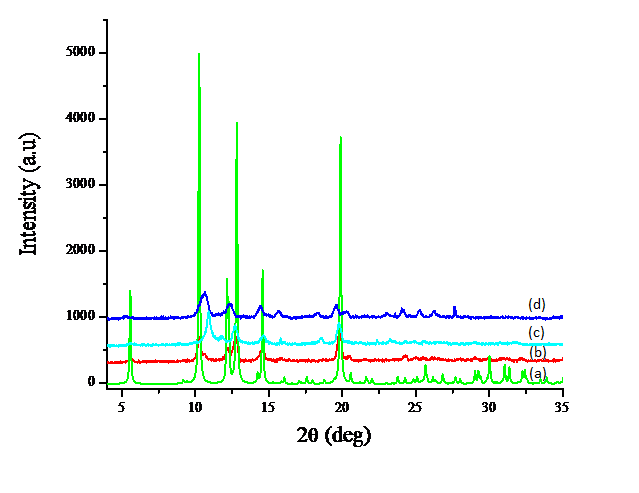
**

**Fig. S7.** Comparison of XRPD patterns of the [Zn2(Fumarate)2(bipy)] formed at different temperatures (a) Simulated patterns from the X-ray single crystal data (CSD code MAVNUT01) (b) 160oC /16hrs (c) 150oC/16 hrs (d) 100oC/16 hrs.

**Table S1:** Elemental Analysis data for product **1** [Ni(NO3)2(bipy)2](pyrene)2 **C52H36O6N6Ni**

| Element | C | H | N | Metal |
| --- | --- | --- | --- | --- |
| Experimental % | 69.58 | 3.94 | 9.45 | 6.60 |
| Theoretical % | 69.40 | 4.00 | 9.34 | 6.53 |

**Table S2:** Elemental Analysis data for product **2** [Zn2(fumarate)2(bipy)] **C18H12N2O8Zn2**

| Element | C | H | N | Metal |
| --- | --- | --- | --- | --- |
| Experimental % | 41.23 | 2.44 | 5.15 | 25.19 |
| Theoretical % | 41.63 | 2.33 | 5.44 | 25.31 |
